# Supplementary material for: Anhydrite dissolution dynamics as a hydrogeochemical tracer of seismic-fluid coupling: insights from the East Anatolian Fault Zone, Türkiye
Source: Copernicus journal article supplement (doi:10.5194/hess-29-5331-2025), 2025-10-20
Supplement: Supplementary file 1 [file 06 Supporting Information.pdf › 06 Supporting Information.pdf]

## **Contents of this file**

**Part S1:** The water-rock interaction process of EAFZ groundwaters are simulated by PHREEQC software.

### **Part S2: Supplementary Figures**

Figure S1. Cl-SO<sub>4</sub>-HCO<sub>3</sub> ternary diagram (Giggenbach, 1991)

Figure S2. Statistical Figure of trace elements (B, Al, Ba, Li, Ra and Sr). Literature data from (Aydin et al., 2020; Baba et al., 2019; Okan et al., 2018; Yuce et al., 2014; Pasvanoglu, 2020).

Figure S3. Spider diagram of the water in the EAFZ. Enrichment coefficients (weight ratios) normalized by Ti.  $EF_i = (C_i/C_{Ti})_w / (C_i/C_{Ti})_r$ , where i is element, w is water, r is rock. Rocks chemistry are taken from (Nurlu, 2020).

### **Part S3: Supplementary Tables**

Table S1 Chemical and hydrogen and oxygen isotopic compositions of EAFZ groundwater, 2013-2023. Data source: (Aydin et al., 2020; Baba et al., 2019; Okan et al., 2018; Yuce et al., 2014; Pasvanoglu, 2020; Yasın and YÜce, 2023; Karaoğlu et al., 2019).

Table S2 Temperature results obtained with empirical chemical geothermometers (values in °C) and depths (km) of origin for EAFZ groundwaters.

### **Part S4. Videos:**

Video. 1 Seismic precursor anomaly of HS14 geothermal fluid. Shooting time: A month before the earthquake.

Video. 2 Post-earthquake anomaly of HS04 geothermal fluid. Shooting time: March 26<sup>th</sup>, 2023.

## Part S1:

PHREEQC is a powerful water chemistry simulation software. In this study, we used its function to simulate “Irreversible Reactions” (Parkhurst and Appelo, 2013).

### Mineral data preparation

The proportion of minerals in water-rock reaction was calculated by CIPW (Cross, Iddings, Pirsson, Washington) (Table P1-1 and P1-2). The calculated data were from Karaoğlu et al. (2020).

Table P1-1 Results of CIPW calculation

| Mineral     | Quartz | Plagioclase | Orthoclase | clinopyroxene | orthopyroxene | Ilmenite | Hematite | Apatite | Sphene |
|-------------|--------|-------------|------------|---------------|---------------|----------|----------|---------|--------|
| content wt% | 6.1    | 58          | 13.12      | 3.59          | 6.28          | 0.28     | 8.36     | 0.86    | 3.42   |

Table P1-2 Results of standardization of minerals associated with water-rock reaction

| Mineral             | Plagioclase | Orthoclase | pyroxene |
|---------------------|-------------|------------|----------|
| content wt%         | 58          | 13.12      | 9.87     |
| standardization %wt | 0.72        | 0.16       | 0.12     |

Note: The minerals involved in the water-rock reaction are mainly plagioclase, potassium feldspar and pyroxene, and the three minerals are re-standardized according to 100%. Pyroxene is the sum of two kinds of pyroxene.

### PHREEQC simulation step (Table P1-3)

#### Choose Databases: `llnl.dat`

#### `SOLUTION_SPREAD` setup:

HS08 is a river sample, and the initial simulated water sample is defined as the chemical composition of HS08. The initial temperature is 53°C, which is the thermal reservoir temperature of the river water estimated by SiO<sub>2</sub>.

#### `EQUILIBRIUM_PHASES` setup:

Italiano et al. (2013) reported that the carbon dioxide volume fraction of EAFZ ranges from 88.4% to 99.9%. Therefore, the initial CO<sub>2</sub> percentage is set as 88.4%, and the logarithm is 1.95.

**REACTION** setup: We set up 6 groups of reactants mixed in different proportions respectively, as shown in Table P1-4:

Table P1-3 PHREEQC code and description

| Steps                                                                                                                                                                                                                                                                                              | Instructions                                |
|----------------------------------------------------------------------------------------------------------------------------------------------------------------------------------------------------------------------------------------------------------------------------------------------------|---------------------------------------------|
| SOLUTION_SPREAD<br>-units mg/l<br>Temperature pH Si Li Na K Mg Ca F Cl Br N(5) S(6)<br>HCO3 B Al Mn Fe Sr Ba Zn<br>as SiO2 as NO3 as SO4<br>53 8.43 15.15 1.00E-06 1.13 1.00E-06 4.47 55.34 0.4411<br>1.06 1.00E-06 3.83 5.69 165.72358 0.00477 0.01227<br>0.00105 0.01252 0.05578 0.00189 0.01899 | Initial reactant input (HS08)               |
| EQUILIBRIUM_PHASES 1<br>CO2(g) 0 1.95                                                                                                                                                                                                                                                              | Equilibrium phases setting                  |
| Reaction 1<br>NaCl 1<br>0.07 moles                                                                                                                                                                                                                                                                 | Deep fluid mixing ratio setting             |
| save solution 1<br>end<br>use solution 1                                                                                                                                                                                                                                                           | Store the mixed solution                    |
| REACTION 2<br>Calcite 1<br>Anhydrite 0.3<br>albite 0.4<br>Anorthite 0.4<br>Ca-Al_Pyroxene 0.1<br>K-feldspar 0.16<br>Dolomite 1                                                                                                                                                                     | Water rock reaction mineral Settings        |
| 1 moles in 20 steps                                                                                                                                                                                                                                                                                | Reaction steps and total amount of reaction |

Table P1-4 The proportion of minerals added

|    | Mineral             | content | Albite | Anorthite | Calcite | Dolomite | Anhydrite | Orthoclase | pyroxene |
|----|---------------------|---------|--------|-----------|---------|----------|-----------|------------|----------|
| R1 |                     | 0%      | 0.7    | 0.02      | 0.4     | 0.4      | 0         | 0.16       | 0.12     |
| R2 | deep fluid          | 2%      |        | 0.02      | 0.4     | 0.4      | 0         | 0.16       | 0.12     |
| R3 | (NaCl)              | 5%      |        | 0.02      | 0.4     | 0.4      | 0         | 0.16       | 0.12     |
| R4 |                     | 7%      |        | 0.02      | 0.4     | 0.4      | 0         | 0.16       | 0.12     |
| R5 | Water-rock reaction | 30%     | 0.4    | 0.4       | 1       | 1        | 0.3       | 0          | 0        |
| R6 | (Anhydrite)         | 100%    | 0      | 0         | 0       | 0        | 1         | 0          | 0        |

The total amount of reaction was set to 1mol, and the reaction was carried out in 20 steps. The simulation results are shown in Table P1-5.

Table P1-5 Simulation results of water-rock interaction in the EAFZ by PHREEQC.

| step | 2%NaCl           |                               |                               |                 |                                                |                 | 5%NaCl           |                               |                               |                 |                                                |                 | 7%NaCl           |                               |                               |                 |                                                |                 |
|------|------------------|-------------------------------|-------------------------------|-----------------|------------------------------------------------|-----------------|------------------|-------------------------------|-------------------------------|-----------------|------------------------------------------------|-----------------|------------------|-------------------------------|-------------------------------|-----------------|------------------------------------------------|-----------------|
|      | Ca <sup>2+</sup> | SO <sub>4</sub> <sup>2+</sup> | HCO <sub>3</sub> <sup>-</sup> | Cl <sup>-</sup> | HCO <sub>3</sub> <sup>-</sup> +Cl <sup>-</sup> | Na <sup>+</sup> | Ca <sup>2+</sup> | SO <sub>4</sub> <sup>2+</sup> | HCO <sub>3</sub> <sup>-</sup> | Cl <sup>-</sup> | HCO <sub>3</sub> <sup>-</sup> +Cl <sup>-</sup> | Na <sup>+</sup> | Ca <sup>2+</sup> | SO <sub>4</sub> <sup>2+</sup> | HCO <sub>3</sub> <sup>-</sup> | Cl <sup>-</sup> | HCO <sub>3</sub> <sup>-</sup> +Cl <sup>-</sup> | Na <sup>+</sup> |
|      | mol/L            |                               |                               |                 |                                                |                 | mol/L            |                               |                               |                 |                                                |                 | mol/L            |                               |                               |                 |                                                |                 |
| Mix  | 1.37             | 0.05                          | 0.00                          | 0.03            | 0.03                                           | 0.05            | 1.37             | 0.05                          | 0.00                          | 0.03            | 0.03                                           | 0.05            | 1.37             | 0.05                          | 0.00                          | 0.03            | 0.03                                           | 0.05            |
| 0    | 1.37             | 0.05                          | 0.14                          | 19.96           | 20.10                                          | 19.98           | 1.37             | 0.05                          | 0.14                          | 49.67           | 49.81                                          | 49.69           | 1.37             | 0.05                          | 0.14                          | 69.38           | 69.52                                          | 69.40           |
| 1    | 32.88            | 0.03                          | 54.65                         | 19.83           | 74.48                                          | 51.82           | 33.34            | 0.03                          | 54.56                         | 49.41           | 103.97                                         | 79.96           | 33.61            | 0.03                          | 54.47                         | 69.04           | 123.51                                         | 98.67           |
| 2    | 58.52            | 0.02                          | 82.68                         | 19.81           | 102.49                                         | 83.42           | 58.91            | 0.02                          | 82.37                         | 49.36           | 131.73                                         | 111.03          | 59.16            | 0.02                          | 82.15                         | 68.99           | 151.14                                         | 129.39          |
| 3    | 79.54            | 0.02                          | 103.91                        | 19.81           | 123.72                                         | 114.52          | 79.93            | 0.02                          | 103.48                        | 49.37           | 152.85                                         | 141.75          | 80.17            | 0.02                          | 103.19                        | 69.01           | 172.19                                         | 159.85          |
| 4    | 97.70            | 0.02                          | 120.72                        | 19.82           | 140.54                                         | 145.23          | 98.08            | 0.02                          | 120.20                        | 49.40           | 169.60                                         | 172.14          | 98.32            | 0.02                          | 119.85                        | 69.04           | 188.89                                         | 190.03          |
| 5    | 113.76           | 0.02                          | 134.27                        | 19.83           | 154.10                                         | 175.59          | 114.13           | 0.02                          | 133.68                        | 49.43           | 183.11                                         | 202.23          | 114.38           | 0.02                          | 133.28                        | 69.09           | 202.37                                         | 219.93          |
| 6    | 128.21           | 0.02                          | 145.28                        | 19.85           | 165.12                                         | 205.64          | 128.58           | 0.02                          | 144.63                        | 49.47           | 194.09                                         | 232.01          | 128.81           | 0.02                          | 144.19                        | 69.14           | 213.33                                         | 249.54          |
| 7    | 141.37           | 0.02                          | 154.23                        | 19.86           | 174.09                                         | 235.38          | 141.73           | 0.02                          | 153.53                        | 49.50           | 203.03                                         | 261.51          | 141.96           | 0.02                          | 153.07                        | 69.19           | 222.26                                         | 278.87          |
| 8    | 153.46           | 0.02                          | 161.47                        | 19.88           | 181.35                                         | 264.83          | 153.81           | 0.02                          | 160.74                        | 49.54           | 210.27                                         | 290.72          | 154.04           | 0.02                          | 160.26                        | 69.23           | 229.49                                         | 307.92          |
| 9    | 164.65           | 0.02                          | 167.27                        | 19.89           | 187.16                                         | 293.98          | 165.00           | 0.02                          | 166.51                        | 49.57           | 216.08                                         | 319.64          | 165.23           | 0.02                          | 166.01                        | 69.27           | 235.28                                         | 336.68          |
| 10   | 175.09           | 0.02                          | 171.83                        | 19.90           | 191.73                                         | 322.83          | 175.43           | 0.02                          | 171.05                        | 49.59           | 220.65                                         | 348.26          | 175.66           | 0.02                          | 170.54                        | 69.31           | 239.85                                         | 365.15          |
| 11   | 184.86           | 0.02                          | 175.31                        | 19.91           | 195.22                                         | 351.38          | 185.21           | 0.02                          | 174.52                        | 49.62           | 224.14                                         | 376.58          | 185.43           | 0.02                          | 174.00                        | 69.34           | 243.33                                         | 393.31          |
| 12   | 194.07           | 0.02                          | 177.85                        | 19.92           | 197.77                                         | 379.62          | 194.41           | 0.02                          | 177.05                        | 49.63           | 226.68                                         | 404.59          | 194.64           | 0.02                          | 176.52                        | 69.36           | 245.88                                         | 421.17          |
| 13   | 202.77           | 0.02                          | 179.55                        | 19.92           | 199.48                                         | 407.54          | 203.12           | 0.02                          | 178.75                        | 49.64           | 228.39                                         | 432.28          | 203.34           | 0.02                          | 178.22                        | 69.36           | 247.58                                         | 448.70          |
| 14   | 211.04           | 0.02                          | 180.51                        | 19.92           | 200.44                                         | 435.13          | 211.38           | 0.02                          | 179.71                        | 49.64           | 229.35                                         | 459.63          | 211.60           | 0.02                          | 179.18                        | 69.36           | 248.54                                         | 475.89          |
| 15   | 218.91           | 0.02                          | 180.81                        | 19.92           | 200.73                                         | 462.37          | 219.25           | 0.02                          | 180.01                        | 49.63           | 229.64                                         | 486.63          | 219.48           | 0.02                          | 179.49                        | 69.34           | 248.83                                         | 502.74          |
| 16   | 226.43           | 0.01                          | 180.52                        | 19.91           | 200.43                                         | 489.26          | 226.78           | 0.01                          | 179.73                        | 49.61           | 229.34                                         | 513.27          | 227.00           | 0.01                          | 179.21                        | 69.31           | 248.52                                         | 529.21          |
| 17   | 233.65           | 0.01                          | 179.69                        | 19.90           | 199.60                                         | 515.77          | 233.99           | 0.01                          | 178.92                        | 49.57           | 228.49                                         | 539.53          | 234.22           | 0.01                          | 178.41                        | 69.26           | 247.67                                         | 555.31          |
| 18   | 240.59           | 0.01                          | 178.39                        | 19.89           | 198.28                                         | 541.88          | 240.94           | 0.01                          | 177.63                        | 49.53           | 227.16                                         | 565.40          | 241.16           | 0.01                          | 177.13                        | 69.20           | 246.33                                         | 581.00          |
| 19   | 247.29           | 0.01                          | 176.66                        | 19.87           | 196.52                                         | 567.59          | 247.64           | 0.01                          | 175.92                        | 49.47           | 225.39                                         | 590.84          | 247.86           | 0.01                          | 175.43                        | 69.11           | 244.55                                         | 606.27          |
| 20   | 253.77           | 0.01                          | 174.54                        | 19.84           | 194.38                                         | 592.87          | 254.12           | 0.01                          | 173.82                        | 49.40           | 223.23                                         | 615.86          | 254.35           | 0.01                          | 173.35                        | 69.01           | 242.36                                         | 631.11          |

Continued

| step            | 0NaCl                     |                               |                               |                 |                                                |                 | 100%Anhydrite             |                               |                               |                 |                                                |                 | 30%Anhydrite              |                               |                               |                 |                                                |                 |
|-----------------|---------------------------|-------------------------------|-------------------------------|-----------------|------------------------------------------------|-----------------|---------------------------|-------------------------------|-------------------------------|-----------------|------------------------------------------------|-----------------|---------------------------|-------------------------------|-------------------------------|-----------------|------------------------------------------------|-----------------|
|                 | Ca <sup>2+</sup><br>mol/L | SO <sub>4</sub> <sup>2+</sup> | HCO <sub>3</sub> <sup>-</sup> | Cl <sup>-</sup> | HCO <sub>3</sub> <sup>-</sup> +Cl <sup>-</sup> | Na <sup>+</sup> | Ca <sup>2+</sup><br>mol/L | SO <sub>4</sub> <sup>2+</sup> | HCO <sub>3</sub> <sup>-</sup> | Cl <sup>-</sup> | HCO <sub>3</sub> <sup>-</sup> +Cl <sup>-</sup> | Na <sup>+</sup> | Ca <sup>2+</sup><br>mol/L | SO <sub>4</sub> <sup>2+</sup> | HCO <sub>3</sub> <sup>-</sup> | Cl <sup>-</sup> | HCO <sub>3</sub> <sup>-</sup> +Cl <sup>-</sup> | Na <sup>+</sup> |
| Mi <sub>x</sub> | 1.37                      | 0.05                          | 0.00                          | 0.03            | 0.03                                           | 0.05            | 1.37                      | 0.05                          | 0.00                          | 0.03            | 0.03                                           | 0.05            | 1.37                      | 0.05                          | 0.00                          | 0.03            | 0.03                                           | 0.05            |
| 0               | 1.37                      | 0.05                          | 0.13                          | 0.03            | 0.16                                           | 0.05            | 1.37                      | 0.05                          | 0.13                          | 0.03            | 0.16                                           | 0.05            | 1.37                      | 0.05                          | 0.13                          | 0.03            | 0.16                                           | 0.05            |
| 1               | 32.54                     | 0.03                          | 54.66                         | 0.03            | 54.69                                          | 33.02           | 11.65                     | 10.15                         | 0.18                          | 0.03            | 0.21                                           | 0.05            | 48.90                     | 5.80                          | 57.42                         | 0.03            | 57.45                                          | 17.96           |
| 2               | 58.24                     | 0.02                          | 82.88                         | 0.03            | 82.91                                          | 64.96           | 20.50                     | 18.96                         | 0.21                          | 0.03            | 0.24                                           | 0.05            | 87.36                     | 10.35                         | 83.94                         | 0.03            | 83.97                                          | 35.12           |
| 3               | 79.27                     | 0.02                          | 104.19                        | 0.03            | 104.22                                         | 96.31           | 28.87                     | 27.31                         | 0.23                          | 0.03            | 0.26                                           | 0.05            | 123.16                    | 14.32                         | 106.78                        | 0.03            | 106.81                                         | 51.90           |
| 4               | 97.43                     | 0.02                          | 121.06                        | 0.03            | 121.09                                         | 127.23          | 36.95                     | 35.37                         | 0.24                          | 0.03            | 0.27                                           | 0.05            | 156.98                    | 17.86                         | 126.90                        | 0.03            | 126.93                                         | 68.34           |
| 5               | 113.51                    | 0.02                          | 134.66                        | 0.03            | 134.69                                         | 157.78          | 44.81                     | 43.22                         | 0.25                          | 0.03            | 0.28                                           | 0.05            | 189.21                    | 21.03                         | 144.87                        | 0.03            | 144.90                                         | 84.44           |
| 6               | 127.96                    | 0.02                          | 145.71                        | 0.03            | 145.74                                         | 188.00          | 52.50                     | 50.89                         | 0.26                          | 0.03            | 0.29                                           | 0.05            | 220.13                    | 23.88                         | 161.05                        | 0.03            | 161.08                                         | 100.20          |
| 7               | 141.12                    | 0.02                          | 154.69                        | 0.03            | 154.72                                         | 217.91          | 60.02                     | 58.41                         | 0.27                          | 0.03            | 0.30                                           | 0.05            | 249.91                    | 26.45                         | 175.67                        | 0.03            | 175.70                                         | 115.62          |
| 8               | 153.22                    | 0.02                          | 161.96                        | 0.03            | 161.99                                         | 247.51          | 67.42                     | 65.79                         | 0.28                          | 0.03            | 0.31                                           | 0.04            | 278.19                    | 28.79                         | 188.27                        | 0.03            | 188.30                                         | 130.71          |
| 9               | 164.42                    | 0.02                          | 167.78                        | 0.03            | 167.81                                         | 276.82          | 74.68                     | 73.04                         | 0.29                          | 0.03            | 0.31                                           | 0.04            | 303.36                    | 31.01                         | 196.77                        | 0.03            | 196.80                                         | 145.49          |
| 10              | 174.85                    | 0.02                          | 172.35                        | 0.03            | 172.38                                         | 305.82          | 81.83                     | 80.18                         | 0.29                          | 0.03            | 0.32                                           | 0.04            | 325.51                    | 33.13                         | 201.38                        | 0.03            | 201.41                                         | 159.99          |
| 11              | 184.63                    | 0.02                          | 175.84                        | 0.03            | 175.87                                         | 334.52          | 88.87                     | 87.22                         | 0.30                          | 0.03            | 0.33                                           | 0.04            | 345.87                    | 35.10                         | 203.73                        | 0.03            | 203.75                                         | 174.23          |
| 12              | 193.84                    | 0.02                          | 178.39                        | 0.03            | 178.42                                         | 362.92          | 95.81                     | 94.15                         | 0.30                          | 0.03            | 0.33                                           | 0.04            | 365.03                    | 36.91                         | 204.61                        | 0.03            | 204.64                                         | 188.20          |
| 13              | 202.54                    | 0.02                          | 180.09                        | 0.03            | 180.12                                         | 390.99          | 102.64                    | 100.98                        | 0.31                          | 0.03            | 0.34                                           | 0.04            | 383.29                    | 38.57                         | 204.42                        | 0.03            | 204.45                                         | 201.90          |
| 14              | 210.80                    | 0.02                          | 181.05                        | 0.03            | 181.08                                         | 418.73          | 109.39                    | 107.72                        | 0.31                          | 0.03            | 0.34                                           | 0.04            | 400.83                    | 40.06                         | 203.39                        | 0.03            | 203.42                                         | 215.34          |
| 15              | 218.68                    | 0.02                          | 181.35                        | 0.03            | 181.38                                         | 446.13          | 116.05                    | 114.38                        | 0.32                          | 0.03            | 0.35                                           | 0.04            | 417.75                    | 41.40                         | 201.66                        | 0.03            | 201.69                                         | 228.50          |
| 16              | 226.20                    | 0.02                          | 181.05                        | 0.03            | 181.08                                         | 473.18          | 122.62                    | 120.94                        | 0.32                          | 0.03            | 0.35                                           | 0.04            | 434.15                    | 42.59                         | 199.35                        | 0.03            | 199.38                                         | 241.38          |
| 17              | 233.41                    | 0.01                          | 180.21                        | 0.03            | 180.24                                         | 499.85          | 129.11                    | 127.43                        | 0.32                          | 0.03            | 0.35                                           | 0.04            | 450.09                    | 43.63                         | 196.56                        | 0.03            | 196.59                                         | 253.97          |
| 18              | 240.35                    | 0.01                          | 178.90                        | 0.03            | 178.93                                         | 526.14          | 135.52                    | 133.84                        | 0.33                          | 0.03            | 0.36                                           | 0.04            | 465.62                    | 44.53                         | 193.35                        | 0.03            | 193.38                                         | 266.26          |
| 19              | 247.05                    | 0.01                          | 177.15                        | 0.03            | 177.18                                         | 552.02          | 141.86                    | 140.17                        | 0.33                          | 0.03            | 0.36                                           | 0.04            | 480.80                    | 45.30                         | 189.78                        | 0.03            | 189.81                                         | 278.25          |
| 20              | 253.53                    | 0.01                          | 175.02                        | 0.03            | 175.05                                         | 577.47          | 148.12                    | 146.42                        | 0.33                          | 0.03            | 0.36                                           | 0.04            | 495.66                    | 45.93                         | 185.91                        | 0.03            | 185.94                                         | 289.93          |

## Part S2:

Figure S1. Cl-SO<sub>4</sub>-HCO<sub>3</sub> ternary diagram (Giggenbach, 1991)

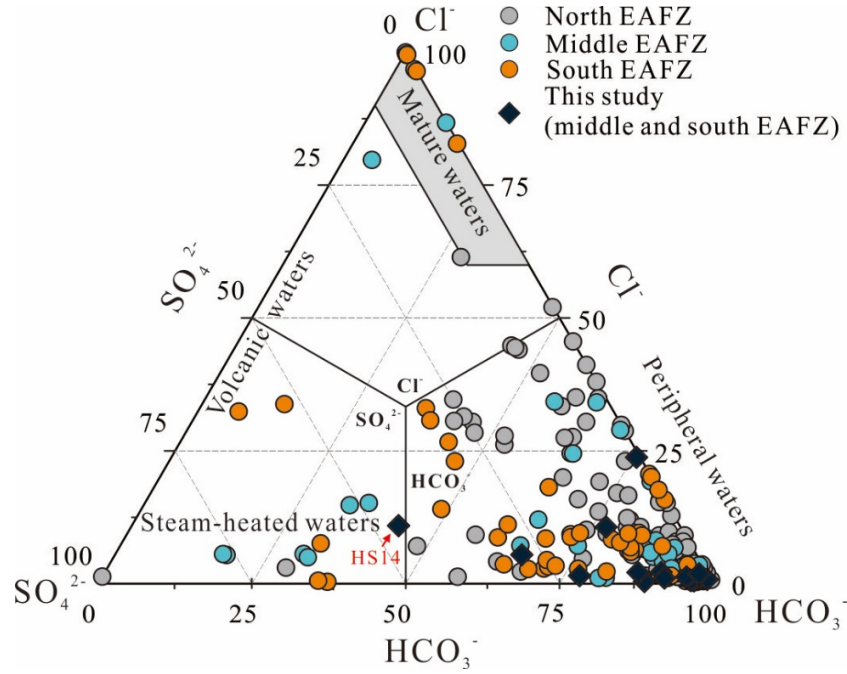

Figure S2. Statistical Figure of trace elements (B, Al, Ba, Li, Ra and Sr). Literature data from (Aydin et al., 2020; Baba et al., 2019; Okan et al., 2018; Yuce et al., 2014; Pasvanoglu, 2020).

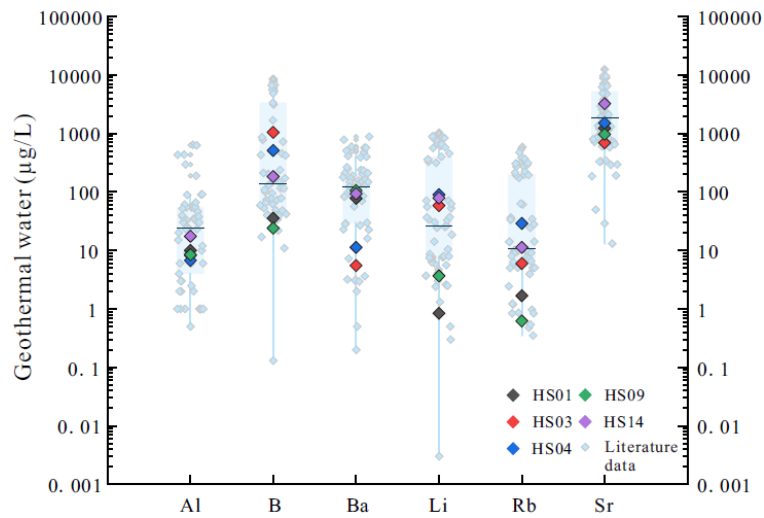

Figure S3. Spider diagram of the water in the EAFZ. Enrichment coefficients (weight ratios) normalized by Ti.  $EF_i = (C_i/C_{Ti})_w / (C_i/C_{Ti})_r$ , where i is element, w is water, r is rock. Rocks chemistry are taken from (Nurlu, 2020).

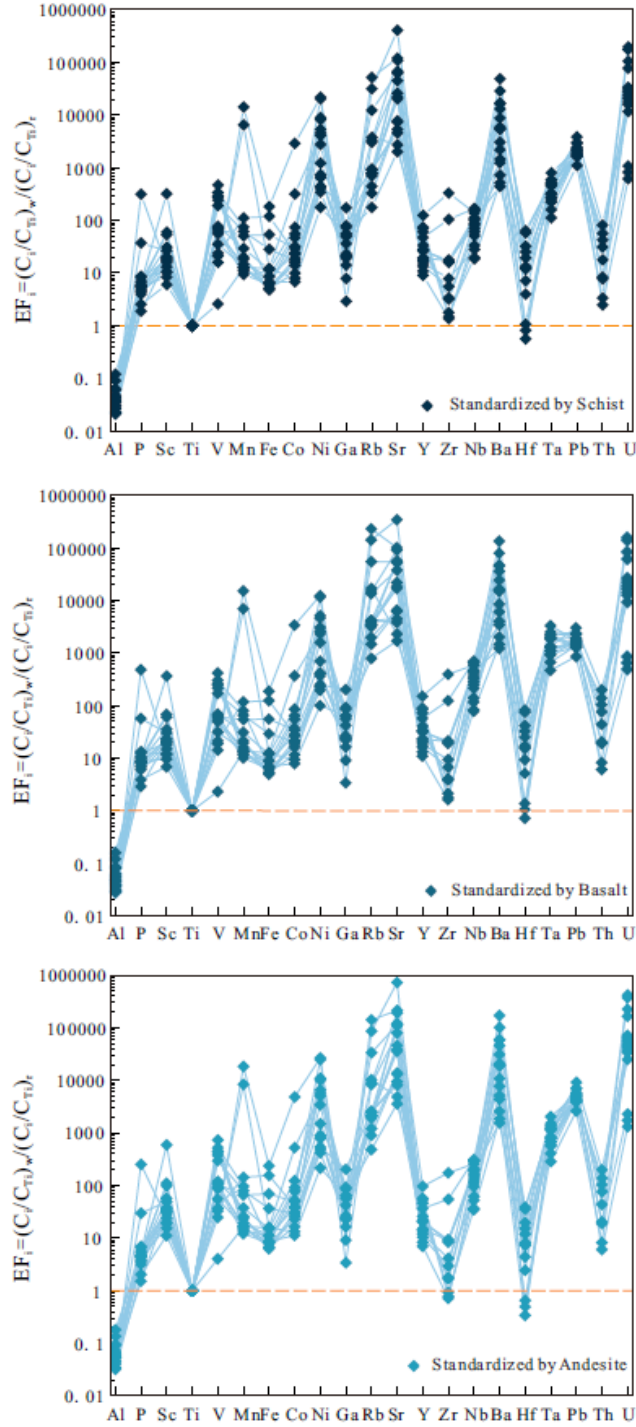

**Part S3:**

Table S1 Chemical and hydrogen and oxygen isotopic compositions of EAFZ groundwater, 2013-2023

| T    | pH  | Na <sup>+</sup> | K <sup>+</sup> | Ca <sup>2+</sup> | Mg <sup>2+</sup> | HCO <sub>3</sub> <sup>-</sup> | Cl <sup>-</sup> | SO <sub>4</sub> <sup>2-</sup> | SiO <sub>2</sub> | δ <sup>18</sup> O | δD     | Data source                                                                                                                                                                                                            |
|------|-----|-----------------|----------------|------------------|------------------|-------------------------------|-----------------|-------------------------------|------------------|-------------------|--------|------------------------------------------------------------------------------------------------------------------------------------------------------------------------------------------------------------------------|
| (°C) |     | mg/L            | mg/L           | mg/L             | mg/L             | mg/L                          | mg/L            | mg/L                          | mg/L             |                   |        |                                                                                                                                                                                                                        |
| 63.2 | 6.8 | 1050.0          | 140.0          | 410.0            | 82.0             | 3100.0                        | 460.0           | 290.0                         | 150.0            | -12.5             | -96.0  | Aydin H., Karakuş H. and Mutlu H. (2020) Hydrogeochemistry of geothermal waters in eastern Turkey: Geochemical and isotopic constraints on water-rock interaction. Journal of Volcanology and Geothermal Research 390. |
| 18.7 | 7.8 | 3.3             | 0.8            | 11.0             | 1.3              | 41.0                          | 0.7             | 4.8                           | 3.5              | -12.7             | -86.0  |                                                                                                                                                                                                                        |
| 55.1 | 9.7 | 39.0            | 0.9            | 13.0             | 0.4              | 83.0                          | 2.8             | 37.0                          | 79.0             | -14.2             | -99.0  |                                                                                                                                                                                                                        |
| 5.5  | 7.4 | 1.3             | 0.3            | 6.2              | 0.5              | 25.0                          | 0.4             | 1.1                           | 2.7              | -13.9             | -94.0  |                                                                                                                                                                                                                        |
| 32.5 | 7.2 | 40.0            | 0.7            | 31.0             | 0.1              | 47.0                          | 4.9             | 110.0                         | 50.0             | -14.0             | -95.0  |                                                                                                                                                                                                                        |
| 17.5 | 7.9 | 2.6             | 0.4            | 22.0             | 2.1              | 76.0                          | 0.4             | 3.4                           | 8.2              | -13.1             | -89.0  |                                                                                                                                                                                                                        |
| 11.7 | 5.3 | 314.0           | 19.0           | 240.0            | 45.0             | 1100.0                        | 150.0           | 230.0                         | 120.0            | -13.7             | -96.0  |                                                                                                                                                                                                                        |
| 13.1 | 7.0 | 6.5             | 5.2            | 43.0             | 7.1              | 150.0                         | 4.5             | 13.0                          |                  | -13.1             | -93.0  |                                                                                                                                                                                                                        |
| 36.6 | 5.6 | 2050.0          | 51.0           | 370.0            | 64.0             | 3000.0                        | 1750.0          | 240.0                         | 120.0            | -13.4             | -104.0 |                                                                                                                                                                                                                        |
| 6.0  | 7.3 | 4.7             | 0.5            | 9.0              | 2.9              | 47.0                          | 0.5             | 2.1                           | 6.0              | -12.1             | -82.0  |                                                                                                                                                                                                                        |
| 15.2 | 6.0 | 48.0            | 8.5            | 33.0             | 33.0             | 370.0                         | 9.0             | 6.1                           | 68.0             | -13.3             | -93.0  |                                                                                                                                                                                                                        |
| 17.4 | 6.8 | 46.0            | 8.2            | 36.0             | 33.0             | 350.0                         | 9.0             | 8.5                           |                  | -13.1             | -92.0  |                                                                                                                                                                                                                        |
| 36.1 | 9.4 | 130.0           | 1.4            | 18.0             | 1.6              | 160.0                         | 79.0            | 63.0                          | 62.0             | -14.5             | -101.0 |                                                                                                                                                                                                                        |
| 9.2  | 7.4 | 20.0            | 0.6            | 25.0             | 9.0              | 150.0                         | 4.8             | 3.3                           |                  | -10.0             | -66.0  |                                                                                                                                                                                                                        |
| 24.3 | 5.9 | 1600.0          | 20.0           | 260.0            | 170.0            | 2500.0                        | 1750.0          | 2.5                           | 120.0            | -12.7             | -93.0  |                                                                                                                                                                                                                        |
| 14.7 | 7.6 | 5.1             | 1.5            | 15.0             | 5.1              | 81.0                          | 1.1             | 1.5                           |                  | -11.9             | -80.0  |                                                                                                                                                                                                                        |
| 11.6 | 5.6 | 160.0           | 13.0           | 260.0            | 150.0            | 1400.0                        | 180.0           | 110.0                         | 110.0            | -13.6             | -100.0 |                                                                                                                                                                                                                        |
| 27.0 | 6.1 | 1100.0          | 46.0           | 260.0            | 78.0             | 3050.0                        | 320.0           | 150.0                         | 100.0            | -10.1             | -84.0  |                                                                                                                                                                                                                        |
| 11.9 | 8.0 | 42.0            | 3.6            | 41.0             | 21.0             | 290.0                         | 6.1             | 21.0                          | 6.9              | -12.7             | -92.0  |                                                                                                                                                                                                                        |
| 36.5 | 6.1 | 2400.0          | 73.0           | 220.0            | 88.0             | 5950.0                        | 660.0           | 160.0                         | 140.0            | -10.5             | -88.0  |                                                                                                                                                                                                                        |
| 57.3 | 7.3 | 2550.0          | 82.0           | 290.0            | 130.0            | 6700.0                        | 590.0           | 150.0                         | 120.0            | -10.7             | -88.0  |                                                                                                                                                                                                                        |
| 14.5 | 7.2 | 16.0            | 3.2            | 51.0             | 29.0             | 310.0                         | 4.1             | 9.6                           | 18.0             | -11.2             | -77.0  |                                                                                                                                                                                                                        |



|      |     |        |       |       |       |        |        |       |       |       |       |
|------|-----|--------|-------|-------|-------|--------|--------|-------|-------|-------|-------|
| 24.9 | 5.7 | 240.0  | 34.0  | 120.0 | 51.0  | 950.0  | 140.0  | 4.7   | 80.0  | -13.8 | -98.0 |
| 13.1 | 7.5 | 16.0   | 3.8   | 31.0  | 13.0  | 190.0  | 2.5    | 4.0   | 6.1   | -13.1 | -94.0 |
| 37.7 | 6.3 | 1800.0 | 59.0  | 520.0 | 160.0 | 2300.0 | 2500.0 | 5.2   | 180.0 | -13.2 | -97.0 |
| 28.6 | 6.3 | 710.0  | 53.0  | 240.0 | 120.0 | 1550.0 | 950.0  | 0.2   | 100.0 | -12.2 | -91.0 |
| 12.5 | 7.1 | 10.0   | 4.2   | 39.0  | 7.5   | 160.0  | 3.4    | 8.1   | 7.5   | -11.0 | -75.0 |
| 57.0 | 6.6 | 900.0  | 120.0 | 450.0 | 240.0 | 2850.0 | 1150.0 | 0.3   | 170.0 | -12.5 | -92.0 |
| 13.6 | 6.1 | 30.0   | 6.5   | 72.0  | 37.0  | 440.0  | 7.3    | 12.0  | 7.5   | -12.8 | -92.0 |
| 28.5 | 5.9 | 460.0  | 17.0  | 82.0  | 96.0  | 1400.0 | 250.0  | 0.1   | 100.0 | -13.1 | -91.0 |
| 12.9 | 7.3 | 16.0   | 1.6   | 20.0  | 9.6   | 140.0  | 5.6    | 1.8   |       | -12.5 | -84.0 |
| 33.4 | 6.2 | 450.0  | 21.0  | 93.0  | 100.0 | 1600.0 | 160.0  | 2.3   | 140.0 | -13.0 | -90.0 |
| 11.6 | 7.2 | 17.0   | 1.2   | 21.0  | 10.0  | 140.0  | 1.1    | 5.3   |       | -12.9 | -88.0 |
| 36.0 | 6.2 | 1700.0 | 42.0  | 150.0 | 81.0  | 2150.0 | 1800.0 | 0.8   | 110.0 | -13.3 | -95.0 |
| 38.4 | 6.5 | 1500.0 | 40.0  | 160.0 | 100.0 | 2700.0 | 1150.0 | 0.4   | 140.0 | -13.6 | -97.0 |
| 19.2 | 7.9 | 1300.0 | 17.0  | 61.0  | 15.0  | 3500.0 | 25.0   | 0.0   | 68.0  | -12.5 | -94.0 |
| 14.5 | 7.4 | 14.0   | 1.1   | 75.0  | 27.0  | 360.0  | 2.7    | 7.0   | 5.3   | -11.0 | -77.0 |
| 33.4 | 6.5 | 570.0  | 19.0  | 420.0 | 600.0 | 4050.0 | 770.0  | 37.0  | 180.0 | -12.3 | -90.0 |
| 18.6 | 5.9 | 80.0   | 8.4   | 67.0  | 330.0 | 1900.0 | 36.0   | 60.0  | 110.0 | -12.2 | -84.0 |
| 13.7 | 7.5 | 2.1    | 0.7   | 2.1   | 43.0  | 210.0  | 2.9    | 12.0  |       | -11.7 | -82.0 |
| 25.3 | 6.5 | 190.0  | 9.9   | 510.0 | 52.0  | 1950.0 | 170.0  | 20.0  | 51.0  | -12.0 | -82.0 |
| 30.3 | 6.4 | 86.0   | 21.0  | 230.0 | 110.0 | 1400.0 | 65.0   | 53.0  | 80.0  | -12.0 | -78.0 |
| 46.9 | 6.6 | 84.0   | 14.0  | 160.0 | 60.0  | 950.0  | 64.0   | 32.0  | 95.0  | -12.2 | -79.0 |
| 41.0 | 6.5 | 46.0   | 10.0  | 240.0 | 70.0  | 1150.0 | 19.0   | 44.0  | 75.0  | -12.0 | -76.0 |
| 24.6 | 6.4 | 770.0  | 46.0  | 150.0 | 110.0 | 1800.0 | 560.0  | 68.0  | 85.0  | -12.1 | -87.0 |
| 19.5 | 5.4 | 22.0   | 34.0  | 49.0  | 9.3   | 130.0  | 19.0   | 120.0 | 86.0  | -14.0 | -96.0 |
| 48.3 | 7.0 | 160.0  | 70.0  | 93.0  | 81.0  | 880.0  | 160.0  | 140.0 | 68.0  | -12.6 | -94.0 |
| 64.2 | 6.6 | 120.0  | 52.0  | 130.0 | 84.0  | 920.0  | 120.0  | 100.0 | 153.0 | -11.3 | -91.0 |
| 53.7 | 7.0 | 160.0  | 59.0  | 180.0 | 69.0  | 990.0  | 120.0  | 160.0 | 60.0  | -11.5 | -92.0 |

---

|      |      |        |       |       |       |        |        |       |       |       |       |                                                                                                                                                                                                              |
|------|------|--------|-------|-------|-------|--------|--------|-------|-------|-------|-------|--------------------------------------------------------------------------------------------------------------------------------------------------------------------------------------------------------------|
| 25.8 | 2.4  | 34.0   | 71.0  | 70.0  | 32.0  | 0.0    | 9.0    | 670.0 | 140.0 | -10.8 | -79.0 |                                                                                                                                                                                                              |
| 50.6 | 7.2  | 170.0  | 69.0  | 69.0  | 76.0  | 590.0  | 180.0  | 130.0 | 56.0  | -12.5 | -95.0 |                                                                                                                                                                                                              |
| 65.2 | 6.6  | 160.0  | 76.0  | 130.0 | 52.0  | 710.0  | 270.0  | 120.0 | 120.0 | -12.8 | -90.0 |                                                                                                                                                                                                              |
| 39.8 | 6.9  | 150.0  | 70.0  | 78.0  | 78.0  | 750.0  | 170.0  | 150.0 | 79.0  | -12.8 | -94.0 |                                                                                                                                                                                                              |
| 11.5 | 7.8  | 17.0   | 1.9   | 48.0  | 30.0  | 310.0  | 1.0    | 8.2   | 5.2   | -12.9 | -91.0 |                                                                                                                                                                                                              |
| 18.1 | 6.2  | 180.0  | 20.0  | 92.0  | 12.0  | 400.0  | 190.0  | 34.0  | 45.0  | -11.4 | -83.0 |                                                                                                                                                                                                              |
| 65.0 | 6.5  | 1850.0 | 190.0 | 330.0 | 64.0  | 1150.0 | 2500.0 | 420.0 | 78.0  | -10.1 | -79.0 |                                                                                                                                                                                                              |
| 51.1 | 7.1  | 730.0  | 70.0  | 220.0 | 75.0  | 1200.0 | 640.0  | 460.0 | 57.0  | -11.3 | -82.0 |                                                                                                                                                                                                              |
| 37.0 | 7.0  | 610.0  | 170.0 | 200.0 | 30.0  | 1600.0 | 360.0  | 150.0 | 100.0 | -11.4 | -90.0 |                                                                                                                                                                                                              |
| 25.8 | 6.1  | 240.0  | 77.0  | 52.0  | 50.0  | 750.0  | 160.0  | 53.0  | 130.0 | -12.2 | -85.0 |                                                                                                                                                                                                              |
| 34.3 | 7.6  | 84.0   | 24.0  | 99.0  | 71.0  | 810.0  | 17.0   | 23.0  | 130.0 | -13.5 | -91.0 |                                                                                                                                                                                                              |
| 25.1 | 6.7  | 380.0  | 120.0 | 140.0 | 170.0 | 1950.0 | 160.0  | 63.0  | 130.0 | -11.6 | -85.0 |                                                                                                                                                                                                              |
| 11.4 | 7.2  | 10.0   | 0.7   | 20.0  | 2.8   | 85.0   | 1.0    | 6.3   | 23.0  | -12.1 | -83.0 |                                                                                                                                                                                                              |
| 53.5 | 7.6  | 2600.0 | 170.0 | 180.0 | 69.0  | 5500.0 | 850.0  | 540.0 | 99.0  | -3.4  | -72.0 |                                                                                                                                                                                                              |
| 25.4 | 6.7  | 40.0   | 4.3   | 180.0 | 120.0 | 1150.0 | 14.0   | 40.0  | 19.0  | -12.7 | -89.0 |                                                                                                                                                                                                              |
| 34.0 | 7.2  | 900.0  | 160.0 | 110.0 | 120.0 | 2100.0 | 560.0  | 260.0 | 31.0  | -10.7 | -82.0 |                                                                                                                                                                                                              |
| 46.8 | 9.2  | 210.0  | 4.2   | 20.0  | 1.5   | 210.0  | 140.0  | 110.0 | 31.0  | -10.9 | -72.0 |                                                                                                                                                                                                              |
| 16.3 | 6.3  | 140.0  | 26.0  | 390.0 | 190.0 | 1200.0 | 27.0   | 850.0 | 11.0  | -10.7 | -69.0 |                                                                                                                                                                                                              |
| 51.6 | 6.9  | 320.0  | 33.0  | 70.0  | 15.0  | 1100.0 | 23.0   | 0.4   | 170.0 | -9.6  | -65.0 |                                                                                                                                                                                                              |
| 14.2 | 10.4 | 120.0  | 13.0  | 100.0 | 62.0  | 900.0  | 32.0   | 4.2   | 9.0   | -9.8  | -66.0 |                                                                                                                                                                                                              |
| 34.5 | 6.5  | 300.0  | 52.0  | 130.0 | 94.0  | 1550.0 | 47.0   | 0.5   | 120.0 | -10.0 | -69.0 |                                                                                                                                                                                                              |
| 11.6 | 6.2  | 6.3    | 2.4   | 25.0  | 7.8   | 110.9  | 2.6    | 4.4   |       | -10.6 | -65.9 | Karaoğlu Ö., Bazargan M.,<br>Baba A. and Browning J.<br>(2019) Thermal fluid<br>circulation around the<br>Karlioia triple junction:<br>Geochemical features and<br>volcano-tectonic<br>implications (Eastern |
| 29.0 | 6.0  | 970.0  | 77.2  | 218.7 | 177.4 | 1971.7 | 1077.0 | 38.7  |       |       |       |                                                                                                                                                                                                              |
| 26.8 | 6.1  | 335.3  | 30.4  | 100.4 | 83.5  | 1139.0 | 208.9  | 15.3  |       | -12.5 | -82.5 |                                                                                                                                                                                                              |
| 22.5 | 6.2  | 269.1  | 25.8  | 189.5 | 182.7 | 2069.7 | 77.3   | 0.9   |       | -12.5 | -78.5 |                                                                                                                                                                                                              |
| 28.2 | 5.8  | 269.0  | 31.0  | 115.2 | 118.1 | 1391.9 | 102.9  | 11.9  |       | -12.2 | -79.8 |                                                                                                                                                                                                              |
| 8.9  | 7.7  | 3.9    | 0.8   | 26.5  | 2.7   | 89.3   | 0.6    | 1.6   |       |       |       |                                                                                                                                                                                                              |

|      |      |        |      |       |       |        |        |        |       |       |       |                                   |
|------|------|--------|------|-------|-------|--------|--------|--------|-------|-------|-------|-----------------------------------|
| 8.6  | 7.1  | 2.6    | 1.1  | 7.1   | 2.1   | 33.9   | 0.3    | 0.9    |       |       |       | Turkey). Geothermics 81, 168-184. |
| 32.0 | 6.1  | 225.1  | 34.0 | 200.7 | 131.4 | 1688.3 | 37.4   | 20.1   | -12.5 | -80.4 |       |                                   |
| 14.8 | 6.2  | 22.1   | 6.1  | 90.8  | 50.5  | 533.0  | 3.5    | 9.5    |       |       |       |                                   |
| 11.0 | 6.5  | 5.7    | 1.9  | 15.7  | 5.6   | 77.0   | 0.8    | 1.5    |       |       |       |                                   |
| 10.3 | 6.5  | 4.1    | 2.3  | 14.9  | 4.5   | 73.9   | 1.1    | 2.0    |       |       |       |                                   |
| 7.2  | 6.7  | 2.7    | 1.2  | 13.2  | 2.5   | 58.6   | 0.3    | 0.8    |       |       |       |                                   |
| 9.2  | 6.7  | 4.1    | 1.3  | 13.3  | 4.4   | 70.9   | 0.5    | 1.5    |       |       |       |                                   |
| 9.2  | 6.9  | 3.7    | 1.4  | 16.1  | 3.6   | 67.8   | 0.6    | 1.7    |       |       |       |                                   |
| 6.7  | 7.1  | 2.6    | 1.6  | 8.5   | 2.4   | 36.9   | 0.5    | 2.0    |       |       |       |                                   |
| 4.9  | 7.3  | 2.4    | 1.1  | 7.1   | 2.1   | 33.8   | 0.2    | 0.8    |       |       |       |                                   |
| 7.5  | 7.1  | 4.8    | 1.0  | 12.7  | 2.6   | 58.5   | 0.4    | 1.6    |       |       |       |                                   |
| 13.2 | 5.4  | 52.8   | 18.6 | 84.3  | 27.5  | 499.1  | 4.1    | 6.4    |       |       |       |                                   |
| 6.0  | 7.3  | 3.2    | 1.4  | 7.5   | 2.1   | 36.9   | 0.3    | 0.9    |       |       |       |                                   |
| 5.4  | 6.4  | 2.6    | 1.3  | 8.1   | 1.6   | 33.9   | 0.3    | 1.0    |       |       |       |                                   |
| 27.0 | 6.0  | 142.0  | 24.4 | 392.0 | 571.0 | 2928.0 | 117.0  | 1076.0 | 144.0 | -6.1  | -31.6 |                                   |
| 27.2 | 6.3  | 144.0  | 24.2 | 473.0 | 597.0 | 2891.0 | 116.0  | 1211.0 | 135.5 |       |       | YasİN D. and YÜCe G.              |
| 27.2 | 6.3  | 148.0  | 25.8 | 493.0 | 552.0 | 2902.0 | 131.0  | 1023.0 | 141.0 | -5.7  | -30.0 | (2023) Isotope and                |
| 31.5 | 6.4  | 247.0  | 39.9 | 705.0 | 542.0 | 3373.0 | 191.0  | 1695.0 | 152.1 | -6.2  | -33.2 | hydrochemical                     |
| 22.0 | 6.3  | 42.4   | 7.4  | 172.0 | 573.0 | 3142.0 | 49.1   | 219.0  | 118.4 | -5.7  | -27.4 | characteristics of thermal        |
| 19.3 | 6.2  | 3.7    | 0.8  | 561.0 | 183.0 | 763.0  | 7.1    | 1287.0 | 40.5  | -6.5  | -32.4 | waters along the active fault     |
| 19.6 | 6.0  | 7.5    | 1.6  | 548.5 | 167.1 | 781.0  | 12.6   | 1408.0 | 37.7  | -6.2  | -35.0 | zone (Erzin-Hatay/Turkey)         |
| 21.3 | 6.2  | 15.6   | 0.6  | 169.0 | 173.0 | 1226.0 | 19.9   | 81.3   | 65.2  | -4.4  | -24.3 | and their geothermal              |
| 23.3 | 11.4 | 1353.0 | 69.0 | 57.7  | 0.0   | 390.0  | 1903.0 | 5.8    | 1.9   | -4.3  | -26.0 | potential. Turkish Journal        |
| 13.0 | 7.1  | 3.2    | 1.2  | 39.3  | 10.6  | 95.0   | 6.3    | 50.0   | 24.0  | -11.7 | -77.0 | of Earth Sciences 32, 721-        |
| 52.0 | 6.3  | 998.0  | 91.2 | 207.0 | 70.5  | 1755.0 | 764.0  | 250.0  | 122.0 | -10.3 | -77.0 | 739.                              |
| 67.0 | 6.2  | 766.0  | 69.3 | 116.0 | 47.8  | 1342.0 | 593.0  | 225.0  | 120.0 | -11.1 | -80.0 |                                   |
| 64.0 | 6.2  | 1062.0 | 93.6 | 144.0 | 23.7  | 1800.0 | 1026.0 | 245.0  | 79.0  | -10.5 | -79.0 | Pasvanoglu S. (2020)              |
|      |      |        |      |       |       |        |        |        |       |       |       | Geochemistry and                  |
|      |      |        |      |       |       |        |        |        |       |       |       | conceptual model of               |
|      |      |        |      |       |       |        |        |        |       |       |       | thermal waters from Erzis -       |

|      |     |       |       |       |       |        |        |       |       |       |       |                                                                                                                                                                                                                                                        |
|------|-----|-------|-------|-------|-------|--------|--------|-------|-------|-------|-------|--------------------------------------------------------------------------------------------------------------------------------------------------------------------------------------------------------------------------------------------------------|
| 59.0 | 6.9 | 220.0 | 105.0 | 110.0 | 53.5  | 1400.0 | 90.0   | 175.0 | 128.0 | -10.2 | -79.0 | Zilan Valley, Eastern<br>Turkey. Geothermics 86.                                                                                                                                                                                                       |
| 64.0 | 7.0 | 738.0 | 105.0 | 121.0 | 19.0  | 1154.0 | 878.0  | 185.0 | 90.0  | -10.4 | -79.0 |                                                                                                                                                                                                                                                        |
| 78.0 | 5.1 | 750.0 | 68.0  | 160.0 | 8.0   | 875.0  | 750.0  | 540.0 | 90.0  |       |       |                                                                                                                                                                                                                                                        |
| 64.0 | 6.3 | 838.0 | 99.0  | 135.0 | 14.0  | 1075.0 | 1075.0 | 250.0 | 90.0  |       |       |                                                                                                                                                                                                                                                        |
| 65.0 | 6.5 | 850.0 | 88.0  | 150.0 | 12.0  | 1000.0 | 950.0  | 208.0 | 80.0  | -10.2 | -80.0 |                                                                                                                                                                                                                                                        |
| 65.0 | 6.5 | 875.0 | 86.0  | 150.0 | 12.0  | 1000.0 | 975.0  | 219.0 | 80.0  |       |       |                                                                                                                                                                                                                                                        |
| 20.0 | 6.4 | 71.0  | 8.4   | 32.0  | 12.0  | 252.0  | 15.6   | 62.0  | 27.0  |       |       |                                                                                                                                                                                                                                                        |
| 80.0 | 7.9 | 830.0 | 74.0  | 96.0  | 56.0  | 994.0  | 715.0  | 565.0 | 109.0 |       |       |                                                                                                                                                                                                                                                        |
| 92.0 | 7.5 | 773.0 | 110.0 | 36.9  | 54.6  | 897.0  | 543.0  | 470.0 | 95.0  |       |       |                                                                                                                                                                                                                                                        |
| 98.0 | 7.7 | 858.0 | 108.0 | 29.5  | 47.0  | 779.0  | 560.0  | 491.0 | 118.0 |       |       |                                                                                                                                                                                                                                                        |
| 14.0 | 8.0 | 20.0  | 3.2   | 17.0  | 9.7   | 80.0   | 13.0   | 48.0  | 15.0  | -11.9 | -84.0 |                                                                                                                                                                                                                                                        |
| 37.1 | 7.1 | 270.6 | 51.4  | 592.9 | 104.0 | 2593.4 | 131.0  | 174.5 |       |       |       |                                                                                                                                                                                                                                                        |
| 38.4 | 6.6 | 285.5 | 58.4  | 591.8 | 106.2 | 2635.7 | 155.0  | 178.8 |       |       |       |                                                                                                                                                                                                                                                        |
| 37.8 | 6.5 | 280.7 | 52.2  | 615.4 | 103.4 | 2676.8 | 134.0  | 176.8 |       |       |       |                                                                                                                                                                                                                                                        |
| 24.5 | 6.2 | 22.0  | 3.6   | 191.7 | 24.7  | 577.6  | 8.0    | 119.3 |       |       |       |                                                                                                                                                                                                                                                        |
| 29.4 | 6.3 | 192.8 | 45.6  | 406.7 | 69.4  | 1731.4 | 110.0  | 130.0 |       |       |       |                                                                                                                                                                                                                                                        |
| 44.5 | 6.5 | 323.2 | 88.7  | 573.7 | 114.1 | 2523.1 | 260.0  | 199.4 |       |       |       | Öztekin Okan Ö., Kalender<br>L. and Çetindağ B. (2018)<br>Trace-element<br>hydrogeochemistry of<br>thermal waters of<br>Karakoçan (Elazığ) and<br>Mazgirt (Tunceli), Eastern<br>Anatolia, Turkey. Journal<br>of Geochemical Exploration<br>194, 29-43. |
| 44.6 | 6.5 | 340.6 | 69.5  | 629.4 | 114.9 | 2857.9 | 200.0  | 191.8 |       |       |       |                                                                                                                                                                                                                                                        |
| 30.7 | 6.3 | 163.8 | 41.3  | 321.9 | 62.1  | 1416.9 | 99.0   | 117.3 |       |       |       |                                                                                                                                                                                                                                                        |
| 19.0 | 6.4 | 387.1 | 56.4  | 140.0 | 132.5 | 1769.0 | 166.0  | 107.2 |       |       |       |                                                                                                                                                                                                                                                        |
| 13.1 | 5.8 | 13.4  | 1.7   | 99.3  | 8.6   | 345.1  | 8.0    | 8.0   |       |       |       |                                                                                                                                                                                                                                                        |
| 14.5 | 5.9 | 21.7  | 3.2   | 90.4  | 15.6  | 369.8  | 12.0   | 11.0  |       |       |       |                                                                                                                                                                                                                                                        |
| 13.2 | 6.1 | 19.6  | 3.3   | 106.4 | 10.2  | 392.9  | 10.0   | 8.0   |       |       |       |                                                                                                                                                                                                                                                        |
| 12.6 | 6.0 | 20.5  | 2.0   | 57.9  | 11.0  | 240.4  | 18.0   | 7.8   |       |       |       |                                                                                                                                                                                                                                                        |
| 12.8 | 6.8 | 52.7  | 4.1   | 106.6 | 21.3  | 512.3  | 15.0   | 23.5  |       |       |       |                                                                                                                                                                                                                                                        |
| 11.3 | 6.0 | 27.0  | 4.2   | 147.5 | 10.0  | 522.7  | 13.0   | 17.5  |       |       |       |                                                                                                                                                                                                                                                        |
| 14.3 | 6.1 | 32.1  | 6.3   | 123.0 | 15.3  | 488.7  | 14.0   | 14.1  |       |       |       |                                                                                                                                                                                                                                                        |

|      |      |       |      |       |       |        |       |       |      |       |       |                                                                                                                                                                                                                                                                                             |
|------|------|-------|------|-------|-------|--------|-------|-------|------|-------|-------|---------------------------------------------------------------------------------------------------------------------------------------------------------------------------------------------------------------------------------------------------------------------------------------------|
| 12.0 | 6.4  | 9.9   | 1.9  | 98.6  | 13.6  | 356.3  | 5.0   | 13.8  |      |       |       |                                                                                                                                                                                                                                                                                             |
| 37.7 | 6.2  | 254.2 | 62.6 | 514.5 | 105.1 | 2349.2 | 156.0 | 180.7 |      |       |       |                                                                                                                                                                                                                                                                                             |
| 38.0 | 6.7  | 288.7 | 74.5 | 584.5 | 116.5 | 2731.6 | 136.0 | 178.5 |      |       |       |                                                                                                                                                                                                                                                                                             |
| 38.0 | 6.8  | 257.7 | 62.9 | 370.2 | 107.4 | 1930.0 | 146.0 | 178.0 |      |       |       |                                                                                                                                                                                                                                                                                             |
| 24.7 | 6.8  | 20.1  | 3.3  | 176.3 | 25.1  | 531.5  | 7.0   | 119.0 |      |       |       |                                                                                                                                                                                                                                                                                             |
| 27.9 | 6.2  | 198.4 | 43.2 | 342.0 | 72.5  | 1599.5 | 92.0  | 131.4 |      |       |       |                                                                                                                                                                                                                                                                                             |
| 45.0 | 6.5  | 351.0 | 84.4 | 607.5 | 118.4 | 2925.2 | 141.0 | 192.2 |      |       |       |                                                                                                                                                                                                                                                                                             |
| 44.4 | 6.5  | 344.8 | 81.3 | 600.1 | 117.4 | 2852.5 | 135.0 | 193.7 |      |       |       |                                                                                                                                                                                                                                                                                             |
| 30.0 | 6.4  | 172.2 | 37.4 | 315.7 | 64.7  | 1449.0 | 98.0  | 121.2 |      |       |       |                                                                                                                                                                                                                                                                                             |
| 19.5 | 6.4  | 417.1 | 63.6 | 595.1 | 157.9 | 3329.6 | 121.0 | 105.0 |      |       |       |                                                                                                                                                                                                                                                                                             |
| 14.6 | 6.4  | 10.9  | 1.6  | 97.3  | 8.7   | 338.3  | 7.0   | 8.5   |      |       |       |                                                                                                                                                                                                                                                                                             |
| 15.2 | 6.5  | 20.5  | 3.0  | 92.5  | 16.3  | 378.3  | 11.0  | 11.0  |      |       |       |                                                                                                                                                                                                                                                                                             |
| 13.3 | 6.5  | 12.7  | 3.8  | 103.0 | 9.2   | 375.7  | 6.0   | 4.9   |      |       |       |                                                                                                                                                                                                                                                                                             |
| 13.8 | 5.9  | 21.1  | 1.8  | 56.9  | 11.5  | 240.8  | 15.0  | 12.0  |      |       |       |                                                                                                                                                                                                                                                                                             |
| 18.1 | 6.7  | 45.9  | 2.8  | 104.8 | 21.8  | 481.8  | 13.0  | 19.0  |      |       |       |                                                                                                                                                                                                                                                                                             |
| 15.1 | 6.2  | 21.2  | 5.0  | 148.8 | 9.8   | 522.7  | 9.0   | 10.0  |      |       |       |                                                                                                                                                                                                                                                                                             |
| 16.7 | 7.1  | 71.8  | 7.3  | 128.3 | 14.5  | 609.9  | 11.0  | 14.0  |      |       |       |                                                                                                                                                                                                                                                                                             |
| 12.8 | 6.3  | 16.1  | 1.7  | 103.0 | 14.9  | 402.8  | 8.0   | 6.3   |      |       |       |                                                                                                                                                                                                                                                                                             |
| 14.5 | 10.5 | 3.5   | 0.3  | 14.9  | 1.7   | 1.8    | 12.0  | 0.0   | 1.5  | -6.8  | -48.2 | Baba A., Şaroğlu F., Akkuş I., Özel N., Yeşilnacar M. İ., Nalbantçılar M. T., Demir M. M., Gökçen G., Arslan Ş., Dursun N., Uzelli T. and Yazdani H. (2019) Geological and hydrogeochemical properties of geothermal systems in the southeastern region of Turkey. Geothermics 78, 255-271. |
| 22.5 | 11.7 | 77.2  | 2.7  | 66.9  | 0.0   | 0.0    | 66.9  | 0.0   | 0.2  | -7.9  | -45.4 |                                                                                                                                                                                                                                                                                             |
| 27.8 | 8.2  | 12.5  | 3.9  | 45.6  | 24.2  | 303.8  | 5.9   | 9.9   | 15.3 | -9.4  | -57.8 |                                                                                                                                                                                                                                                                                             |
| 15.9 | 7.6  | 14.1  | 2.2  | 63.8  | 15.7  | 285.5  | 5.3   | 24.8  | 8.4  | -7.4  | -42.0 |                                                                                                                                                                                                                                                                                             |
| 29.0 | 7.2  | 87.5  | 8.4  | 81.0  | 18.1  | 336.7  | 126.8 | 54.7  | 11.3 |       |       |                                                                                                                                                                                                                                                                                             |
| 23.8 | 7.4  | 6.5   | 0.9  | 7.0   | 110.0 | 358.1  | 8.0   | 11.1  | 15.6 | -5.8  | -33.7 |                                                                                                                                                                                                                                                                                             |
| 18.3 | 7.4  | 6.5   | 1.0  | 116.0 | 8.0   | 367.2  | 8.5   | 10.2  | 17.2 |       |       |                                                                                                                                                                                                                                                                                             |
| 41.0 | 7.4  | 56.2  | 6.3  | 67.7  | 11.3  | 245.8  | 45.2  | 84.1  | 12.9 | -7.4  | -47.9 |                                                                                                                                                                                                                                                                                             |
| 51.0 | 7.3  | 195.5 | 20.2 | 38.7  | 5.6   | 472.8  | 113.4 | 3.3   | 19.4 | -10.3 | -63.2 |                                                                                                                                                                                                                                                                                             |

|      |     |        |      |       |       |       |        |        |      |      |       |                                                                                                                                                                                                                                                                                                                                                                                                                                          |
|------|-----|--------|------|-------|-------|-------|--------|--------|------|------|-------|------------------------------------------------------------------------------------------------------------------------------------------------------------------------------------------------------------------------------------------------------------------------------------------------------------------------------------------------------------------------------------------------------------------------------------------|
| 84.5 | 6.2 | 2756.1 | 81.9 | 773.6 | 124.7 | 384.3 | 6571.5 | 1287.2 |      | -9.5 | -59.8 |                                                                                                                                                                                                                                                                                                                                                                                                                                          |
| 33.1 | 6.4 | 120.5  | 13.8 | 286.9 | 46.4  | 446.5 | 196.8  | 689.2  | 12.9 | -7.9 | -48.2 |                                                                                                                                                                                                                                                                                                                                                                                                                                          |
| 15.2 | 7.0 | 17.2   | 2.6  | 73.2  | 10.8  | 196.4 | 21.8   | 83.8   | 5.4  | -9.7 | -59.6 |                                                                                                                                                                                                                                                                                                                                                                                                                                          |
| 33.7 | 6.5 | 124.1  | 14.5 | 288.3 | 49.1  | 452.6 | 188.9  | 602.2  | 13.5 | -7.4 | -50.7 |                                                                                                                                                                                                                                                                                                                                                                                                                                          |
| 56.6 | 6.6 | 67.1   | 18.0 | 350.3 | 48.3  | 241.6 | 71.7   | 1015.4 |      | -8.9 | -57.7 |                                                                                                                                                                                                                                                                                                                                                                                                                                          |
| 62.2 | 6.8 | 68.4   | 18.1 | 361.3 | 52.5  | 242.2 | 77.1   | 1062.2 |      | -9.1 | -58.0 |                                                                                                                                                                                                                                                                                                                                                                                                                                          |
| 8.6  | 8.1 | 0.6    | 0.2  | 44.3  | 13.5  | 205.6 | 0.6    | 7.1    | 2.1  | -9.0 | -53.0 |                                                                                                                                                                                                                                                                                                                                                                                                                                          |
| 44.0 | 6.8 | 169.7  | 13.1 | 130.0 | 17.1  | 429.4 | 257.8  | 65.3   | 18.0 | -9.5 | -57.9 |                                                                                                                                                                                                                                                                                                                                                                                                                                          |
| 9.0  | 7.9 | 7.1    | 1.0  | 44.2  | 4.6   | 178.7 | 3.7    | 9.3    | 2.6  |      |       |                                                                                                                                                                                                                                                                                                                                                                                                                                          |
| 21.1 | 7.2 | 26.0   | 2.9  | 101.3 | 24.0  | 342.8 | 32.8   | 85.1   | 8.9  | -9.4 | -56.9 |                                                                                                                                                                                                                                                                                                                                                                                                                                          |
| 20.0 | 9.0 | 450.0  | 16.0 | 4.1   | 0.0   | 565.5 | 301.6  | 17.0   | 7.1  |      |       |                                                                                                                                                                                                                                                                                                                                                                                                                                          |
| 22.7 | 8.0 | 278.5  | 12.7 | 12.5  | 7.7   | 464.2 | 190.6  | 4.2    | 7.0  |      |       |                                                                                                                                                                                                                                                                                                                                                                                                                                          |
| 26.5 | 7.2 | 65.9   | 5.6  | 145.0 | 40.2  | 230.0 | 41.9   | 479.2  | 12.4 |      |       |                                                                                                                                                                                                                                                                                                                                                                                                                                          |
| 27.3 | 7.2 | 68.1   | 5.3  | 151.9 | 43.5  | 249.5 | 39.3   | 501.1  | 12.5 |      |       |                                                                                                                                                                                                                                                                                                                                                                                                                                          |
| 35.0 | 7.3 | 33.6   | 3.0  | 39.9  | 25.6  | 328.2 | 11.9   | 1.8    | 13.9 |      |       |                                                                                                                                                                                                                                                                                                                                                                                                                                          |
| 34.8 | 7.0 | 17.4   | 2.6  | 56.0  | 15.2  | 281.9 | 8.9    | 16.4   | 14.2 |      |       |                                                                                                                                                                                                                                                                                                                                                                                                                                          |
| 20.0 | 7.2 | 13.3   | 2.6  | 67.7  | 31.0  | 311.0 | 23.3   | 40.1   | 26.7 | -6.4 | -31.1 | Yuce G., Italiano F.,<br>D'Alessandro W., Yalcin T.<br>H., Yasin D. U., Gulbay A.<br>H., Ozyurt N. N., Rojay B.,<br>Karabacak V., Bellomo S.,<br>Brusca L., Yang T., Fu C.<br>C., Lai C. W., Ozacar A.<br>and Walia V. (2014) Origin<br>and interactions of fluids<br>circulating over the Amik<br>Basin (Hatay, Turkey) and<br>relationships with the<br>hydrologic, geologic and<br>tectonic settings. Chemical<br>Geology 388, 23-39. |
| 21.0 | 7.5 | 11.9   | 0.9  | 59.3  | 27.4  | 268.0 | 24.1   | 32.0   | 20.2 | -6.5 | -31.3 |                                                                                                                                                                                                                                                                                                                                                                                                                                          |
| 21.0 | 7.2 | 42.6   | 1.0  | 55.0  | 106.0 | 580.0 | 60.8   | 89.9   | 32.3 | -6.1 | -29.8 |                                                                                                                                                                                                                                                                                                                                                                                                                                          |
| 22.1 | 7.6 | 15.5   | 0.7  | 58.5  | 29.5  | 293.0 | 23.5   | 15.8   | 43.1 | -5.6 | -26.3 |                                                                                                                                                                                                                                                                                                                                                                                                                                          |
| 22.6 | 7.4 | 16.0   | 1.3  | 60.7  | 37.1  | 329.0 | 25.2   | 37.2   | 28.8 | -6.4 | -31.7 |                                                                                                                                                                                                                                                                                                                                                                                                                                          |
| 23.3 | 7.1 | 33.6   | 4.3  | 129.0 | 38.8  | 348.0 | 50.0   | 176.0  | 20.6 | -6.0 | -32.5 |                                                                                                                                                                                                                                                                                                                                                                                                                                          |
| 29.0 | 7.3 | 24.8   | 4.7  | 94.3  | 30.2  | 305.0 | 39.3   | 78.5   | 20.7 | -6.7 | -36.6 |                                                                                                                                                                                                                                                                                                                                                                                                                                          |
| 37.7 | 6.6 | 315.0  | 29.6 | 166.0 | 40.6  | 458.0 | 411.0  | 376.0  | 40.0 | -7.0 | -39.5 |                                                                                                                                                                                                                                                                                                                                                                                                                                          |
| 25.8 | 6.9 | 27.2   | 1.3  | 87.2  | 18.4  | 317.0 | 36.5   | 27.8   | 27.2 | -6.8 | -36.7 |                                                                                                                                                                                                                                                                                                                                                                                                                                          |
| 30.3 | 9.0 | 257.0  | 1.0  | 28.1  | 0.2   | 36.6  | 178.0  | 335.0  | 29.2 | -7.1 | -37.1 |                                                                                                                                                                                                                                                                                                                                                                                                                                          |
| 28.9 | 7.1 | 28.5   | 3.6  | 87.1  | 66.0  | 390.0 | 47.1   | 101.0  | 45.4 | -6.8 | -35.5 |                                                                                                                                                                                                                                                                                                                                                                                                                                          |

|      |      |       |      |       |       |       |       |       |      |      |       |
|------|------|-------|------|-------|-------|-------|-------|-------|------|------|-------|
| 31.2 | 6.9  | 80.1  | 9.8  | 133.0 | 67.8  | 253.0 | 59.2  | 469.0 | 69.1 | -6.6 | -34.8 |
| 22.0 | 7.3  | 21.6  | 0.2  | 58.4  | 45.0  | 296.0 | 18.6  | 104.0 | 46.3 | -6.8 | -36.1 |
| 23.1 | 6.9  | 10.2  | 1.9  | 72.6  | 32.4  | 268.0 | 12.4  | 88.3  | 23.5 | -7.3 | -39.4 |
| 16.3 | 7.1  | 5.7   | 0.6  | 67.4  | 16.7  | 262.0 | 9.9   | 6.7   | 16.2 | -7.2 | -36.1 |
| 19.7 | 7.1  | 28.3  | 0.6  | 77.2  | 47.3  | 400.0 | 43.4  | 33.6  | 54.8 | -6.4 | -31.2 |
| 22.5 | 7.4  | 105.0 | 2.2  | 29.1  | 86.6  | 403.0 | 73.5  | 184.0 | 9.5  | -4.6 | -23.6 |
| 20.2 |      | 13.8  | 2.2  | 73.9  | 33.1  | 323.0 | 23.1  | 40.3  | 25.6 | -5.9 | -27.8 |
| 20.4 |      | 12.0  | 0.9  | 61.4  | 30.5  | 262.0 | 21.5  | 31.7  | 20.0 | -5.9 | -28.8 |
| 19.6 |      | 41.5  | 0.7  | 57.8  | 105.0 | 555.0 | 53.2  | 77.3  | 31.6 | -5.9 | -29.3 |
| 38.0 | 6.7  | 315.0 | 28.9 | 131.0 | 48.0  | 445.0 | 354.0 | 353.0 | 39.0 | -6.7 | -38.9 |
| 22.5 | 7.2  | 11.3  | 1.8  | 87.8  | 34.4  | 323.0 | 11.9  | 86.7  | 24.7 | -6.8 | -37.0 |
| 21.8 | 6.9  | 21.2  | 1.4  | 94.6  | 31.9  | 348.0 | 40.4  | 38.8  | 32.0 | -6.3 | -33.2 |
| 22.1 | 7.3  | 9.7   | 1.3  | 80.6  | 31.2  | 323.0 | 9.0   | 64.3  | 21.0 | -7.2 | -38.0 |
| 37.6 | 7.5  | 276.0 | 5.4  | 41.1  | 10.3  | 91.5  | 231.0 | 361.0 | 29.2 | -7.2 | -36.2 |
| 33.7 | 10.6 | 49.9  | 1.8  | 44.7  | 0.1   | 183.0 | 47.6  | 0.2   | 0.2  | -8.7 | -45.0 |
| 25.5 | 11.6 | 28.6  | 0.9  | 83.4  | 0.8   | 244.0 | 45.8  | 0.0   | 0.2  | -7.9 | -40.2 |
| 33.0 | 11.6 | 50.3  | 2.1  | 42.1  | 0.4   | 177.0 | 44.5  | 0.0   | 0.2  | -8.1 | -42.1 |
| 21.7 | 12.2 | 55.0  | 1.2  | 110.0 | 0.1   | 336.0 | 72.1  | 0.2   | 0.2  | -7.9 | -41.3 |
|      | 6.3  | 0.8   | 0.2  | 3.6   | 0.2   | 13.0  | 1.6   | 4.4   |      | -7.4 | -40.0 |
|      | 6.5  | 0.7   | 0.4  | 2.1   | 0.2   | 11.0  | 1.4   | 2.5   |      | -7.7 | -42.0 |
|      | 6.7  | 0.7   | 0.3  | 2.3   | 0.2   | 5.0   | 1.4   | 3.8   |      | -8.2 | -46.0 |
|      |      | 2.3   | 0.3  | 5.1   | 0.5   | 9.0   | 4.5   | 5.9   |      | -4.5 | -16.7 |
|      |      | 2.2   | 0.4  | 3.9   | 0.4   | 15.0  | 4.2   | 4.1   |      | -4.5 | -18.7 |
|      |      | 2.4   | 0.3  | 3.3   | 0.4   | 7.0   | 4.3   | 4.8   |      | -6.1 | -28.3 |

---

Note: The deep groundwater samples from Yuce et al. 2014 (sample ID: A4, A11, A4-2, A11-2, A38) were mixed with large amounts of seawater, so they were not used for simulation.

---

Table S2 Temperature results obtained with empirical chemical geothermometers (values in °C) and depths (km) of origin for EAFZ groundwaters.

| No   | T<br>(°C) | Na-K   |        |        | K-Mg   | Li-Mg   | Na-Li  | Na-Ca  | K-Ca   | Na-K-<br>Ca | SiO <sub>2</sub> |        |        | Circulation<br>depth(km) |
|------|-----------|--------|--------|--------|--------|---------|--------|--------|--------|-------------|------------------|--------|--------|--------------------------|
|      |           | a      | b      | c      | d      | e       | f      | g      | k      | i           | j                | k      | l      |                          |
| HS01 | 15.8      | 280.56 | 263.18 | 255.02 | 53.70  | 1164.31 | 115.33 | 113.53 | 167.74 | 177.81      | 64.74            | 76.87  | 32.72  | 1.8                      |
| HS02 | 13.2      | 44.69  | 32.02  | 14.64  | 340.90 | 794.35  | 58.83  | -19.47 | -23.39 | 16.11       | 19.81            | 35.51  | -13.08 | 0.0                      |
| HS03 | 13.2      | 97.13  | 83.05  | 65.94  | 110.59 | 329.25  | 256.42 | 136.38 | 80.14  | 78.41       | 74.15            | 85.36  | 42.54  | 2.2                      |
| HS04 | 15.0      | 137.35 | 122.34 | 106.10 | 118.49 | 424.51  | 63.34  | 77.09  | 74.70  | 109.03      | 128.09           | 132.88 | 100.43 | 4.4                      |
| HS05 | 12.7      | 183.61 | 167.67 | 153.17 | 101.56 | 722.02  | -11.79 | 69.20  | 92.54  | 139.57      | 51.58            | 64.90  | 19.12  | 1.3                      |
| HS06 | 15.0      | 211.67 | 195.23 | 182.19 | 117.90 | 1098.86 | -23.85 | 43.82  | 87.06  | 149.16      | 53.76            | 66.89  | 21.36  | 1.4                      |
| HS07 | 9.8       | 24.22  | 12.15  | -5.07  | 328.05 | 756.00  | 28.67  | -0.77  | -23.53 | 6.19        | 37.30            | 51.78  | 4.54   | 0.7                      |
| HS08 | 8.1       | 16.25  | 4.41   | -12.71 | 326.88 | 752.56  | 17.37  | 8.17   | -23.55 | 2.17        | 53.32            | 66.49  | 20.90  | 1.4                      |
| HS09 | 18.0      | 161.91 | 146.39 | 130.98 | 127.21 | 539.15  | 49.11  | 59.01  | 76.01  | 121.33      | 72.83            | 84.17  | 41.15  | 2.1                      |
| HS10 | 20.0      | 7.89   | -3.69  | -20.68 | 456.36 | 1200.82 | 5.80   | 38.91  | -15.52 | 1.49        | 81.15            | 91.63  | 49.90  | 2.5                      |
| HS11 | 16.3      | 166.55 | 150.93 | 135.70 | 148.33 | 985.95  | -6.80  | 27.09  | 57.05  | 113.61      | 38.24            | 52.65  | 5.49   | 0.8                      |
| HS12 | 16.9      | 0.78   | -10.57 | -27.44 | 436.27 | 1120.85 | -3.85  | 56.07  | -13.62 | -1.56       | 98.46            | 107.00 | 68.28  | 3.2                      |
| HS13 | 18.2      | 232.80 | 216.03 | 204.29 | 97.49  | 530.50  | 52.80  | 54.40  | 103.32 | 166.87      | 39.42            | 53.74  | 6.69   | 0.8                      |
| HS14 | 23.5      | 226.40 | 209.73 | 197.58 | 48.47  | 350.37  | 216.09 | 188.63 | 187.64 | 224.53      | 87.85            | 97.61  | 56.98  | 2.7                      |
| HS15 | 32.0      | 150.02 | 134.74 | 118.90 | 26.34  | 286.57  | 170.79 | 210.97 | 148.15 | 176.18      | -39.83           | -21.62 | -71.20 |                          |
| HS16 | 24.5      | 299.42 | 281.83 | 275.35 | 25.48  | 540.78  | 122.71 | 258.29 | 274.78 | 375.41      | 82.83            | 93.13  | 51.67  | 2.5                      |

Note: Circulation depth(km) = (T-T<sub>0</sub>)/g+h. “T” is reservoir temperature estimated by SiO<sub>2</sub>. “T<sub>0</sub>” is annual average temperature in EAFZ is 20 °C. “g” is geothermal gradient is ~2.50 °C/100 m. “h” is thickness of the constant temperature zone is 30 m.

a Na-K,  $T = 1390 / [\log(\text{Na/K}) + 1.75] - 273.15$  (Giggenbach, 1988).

b Na-K,  $T = 933 / [\log(\text{Na/K}) + 0.993] - 273.15$  (Arnórsson, 1983).

c Na-K,  $T = 1178 / [\log(\text{Na/K}) + 1.47] - 273.15$  (Nieva and Nieva, 1987).

d K-Mg,  $T = 4410 / [\log(\text{K/Mg}^{1/2}) + 14.0] - 273.15$  (Giggenbach, 1988).

e Li-Mg,  $T = 2200 / [\log(\text{Li/Mg}^{1/2}) + 5.47] - 273.15$  (Kharaka and Mariner, 1989).

f Na-Li,  $T = 1000 / [\log(\text{Na/Li}) + 0.389] - 273.15$  (Fouillac and Michard, 1981).

g Na-Ca,  $T = 1096.7 / [3.08 - \log(\text{Na/Ca}^{1/2})] - 273.15$  (Tonani, 1980).

h K-Ca,  $T = 1930 / [3.861 - \log(\text{K/Ca}^{1/2})] - 273.15$  (Tonani, 1980).



i Na-K-Ca,  $T = 1647 / [\log(\text{Na/K}) + 1/3\log(\text{Ca}^{1/2}/\text{Na}) + 2.24] - 273.15$  (Fournier and Truesdell, 1973).

j Quartz, no steam loss,  $T = 1309 / [5.19 - \log(\text{SiO}_2)] - 273.15$  (Fournier, 1977).

k Quartz, maximum steam loss,  $T = 1522 / [5.75 - \log(\text{SiO}_2)] - 273.15$  (Fournier, 1977).

l Chalcedony,  $T = 1032 / [4.78 - \log(\text{SiO}_2)] - 273.15$  (Fournier, 1977).

**Part S4:**

Videos:

Video. 1 Seismic precursor anomaly of HS14 geothermal fluid. See Supporting Information Video. 1.

Video. 2 Post-earthquake anomaly of HS04 geothermal fluid. See Supporting Information Video. 2.

## References

- Arnórsson, S.: Chemical equilibria in icelandic geothermal systems—Implications for chemical geothermometry investigations, *Geothermics*, 12, 119-128, [https://doi.org/10.1016/0375-6505\(83\)90022-6](https://doi.org/10.1016/0375-6505(83)90022-6), 1983.
- Aydin, H., Karakuş, H., and Mutlu, H.: Hydrogeochemistry of geothermal waters in eastern Turkey: Geochemical and isotopic constraints on water-rock interaction, *Journal of Volcanology and Geothermal Research*, 390, 10.1016/j.jvolgeores.2019.106708, 2020.
- Baba, A., Şaroğlu, F., Akkuş, I., Özel, N., Yeşilnacar, M. İ., Nalbantçılar, M. T., Demir, M. M., Gökçen, G., Arslan, Ş., Dursun, N., Uzelli, T., and Yazdani, H.: Geological and hydrogeochemical properties of geothermal systems in the southeastern region of Turkey, *Geothermics*, 78, 255-271, <https://doi.org/10.1016/j.geothermics.2018.12.010>, 2019.
- Fouillac, C. and Michard, G.: Sodium/lithium ratio in water applied to geothermometry of geothermal reservoirs, *Geothermics*, 10, 55-70, [https://doi.org/10.1016/0375-6505\(81\)90025-0](https://doi.org/10.1016/0375-6505(81)90025-0), 1981.
- Fournier, R. O.: Chemical geothermometers and mixing models for geothermal systems, *Geothermics*, 5, 41-50, [https://doi.org/10.1016/0375-6505\(77\)90007-4](https://doi.org/10.1016/0375-6505(77)90007-4), 1977.
- Fournier, R. O. and Truesdell, A. H.: An empirical Na-K-Ca geothermometer for natural waters, *Geochimica Et Cosmochimica Acta*, 37, 1255-1275, 1973.
- Giggenbach, W. F.: Geothermal solute equilibria. Derivation of Na-K-Mg-Ca geothermometers, *Geochimica et Cosmochimica Acta*, 52, 2749-2765, [https://doi.org/10.1016/0016-7037\(88\)90143-3](https://doi.org/10.1016/0016-7037(88)90143-3), 1988.
- Giggenbach, W. F.: *Chemical Techniques in Geothermal Exploration, Application of Geochemistry in Geothermal Reservoir Development*, 1991.
- Italiano, F., Sasmaz, A., Yuce, G., and Okan, O. O.: Thermal fluids along the East Anatolian Fault Zone (EAFZ): Geochemical features and relationships with the tectonic setting, *Chemical Geology*, 339, 103-114, 10.1016/j.chemgeo.2012.07.027, 2013.
- Karaoğlu, Ö., Bazargan, M., Baba, A., and Browning, J.: Thermal fluid circulation around the Karliova triple junction: Geochemical features and volcano-tectonic implications

- (Eastern Turkey), *Geothermics*, 81, 168-184, 10.1016/j.geothermics.2019.05.003, 2019.
- Karaoğlu, Ö., Gülmez, F., Göçmengil, G., Lustrino, M., Di Giuseppe, P., Manetti, P., Savaşçın, M. Y., and Agostini, S.: Petrological evolution of Karlıova-Varto volcanism (Eastern Turkey): Magma genesis in a transtensional triple-junction tectonic setting, *Lithos*, 364-365, 10.1016/j.lithos.2020.105524, 2020.
- Kharaka, Y. K. and Mariner, R. H.: Chemical Geothermometers and Their Application to Formation Waters from Sedimentary Basins, *Thermal History of Sedimentary Basins*, New York, NY, 1989//, 99-117,
- Nieva, D. and Nieva, R.: Developments in geothermal energy in Mexico—part twelve. A cationic geothermometer for prospecting of geothermal resources, *Heat Recovery Systems and CHP*, 7, 243-258, [https://doi.org/10.1016/0890-4332\(87\)90138-4](https://doi.org/10.1016/0890-4332(87)90138-4), 1987.
- Nurlu, N.: Geochronological, Geochemical and Sr-Nd-Pb Isotope Characteristics of the Meydan Ophiolite, SE Turkey: Petrogenesis and Implications for Mesozoic Tectonic Evolution, *Geochemistry International*, 58, 639-669, 10.1134/s0016702920060099, 2020.
- Okan, O. O., Kalender, L., and Cetindag, B.: Trace-element hydrogeochemistry of thermal waters of Karakocan (Elazig) and Mazgirt (Tunceli), Eastern Anatolia, Turkey, *Journal of Geochemical Exploration*, 194, 29-43, 10.1016/j.gexplo.2018.07.006, 2018.
- Parkhurst, D. L. and Appelo, C. A. J.: Description of input and examples for PHREEQC version 3: a computer program for speciation, batch-reaction, one-dimensional transport, and inverse geochemical calculations, *Techniques and Methods*, 6-A43, U.S. Geological Survey, Reston, VA, 10.3133/tm6A43, 2013.
- Pasvanoglu, S.: Geochemistry and conceptual model of thermal waters from Ercis - Zilan Valley, Eastern Turkey, *Geothermics*, 86, 10.1016/j.geothermics.2020.101803, 2020.
- Tonani, F. B.: Some Remarks on the Application of Geochemical Techniques in geothermal exploration, *Advances in European Geothermal Research*, 428-443, [https://doi.org/10.1007/978-94-009-9059-3\\_38](https://doi.org/10.1007/978-94-009-9059-3_38), 1980.
- YASİN, D. and YÜCE, G.: Isotope and hydrochemical characteristics of thermal waters along the active fault zone (Erzin-Hatay/Turkey) and their geothermal potential, *Turkish Journal of Earth Sciences*, 32, 721-739, 10.55730/1300-0985.1871, 2023.

Yuce, G., Italiano, F., D'Alessandro, W., Yalcin, T. H., Yasin, D. U., Gulbay, A. H., Ozyurt, N. N., Rojay, B., Karabacak, V., Bellomo, S., Brusca, L., Yang, T., Fu, C. C., Lai, C. W., Ozacar, A., and Walia, V.: Origin and interactions of fluids circulating over the Amik Basin (Hatay, Turkey) and relationships with the hydrologic, geologic and tectonic settings, *Chemical Geology*, 388, 23-39, 10.1016/j.chemgeo.2014.09.006, 2014.
