# Supplementary material for: Anhydrite dissolution dynamics as a hydrogeochemical tracer of seismic-fluid coupling: insights from the East Anatolian Fault Zone, Türkiye
Source: Copernicus journal article supplement (doi:10.5194/hess-29-5331-2025), 2025-10-20
Supplement: Supplementary file [file hess-29-5331-2025-supplement-title-page.pdf › hess-29-5331-2025-supplement-title-page.pdf]

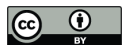

*Supplement of*

**Anhydrite dissolution dynamics as a hydrogeochemical tracer of seismic-fluid coupling: insights from the East Anatolian Fault Zone, Türkiye**

**Zebin Luo et al.**

*Correspondence to:* Xiaocheng Zhou (zhouxiaocheng188@163.com)

- hess-29-5331-2025-supplement-title-page.pdf
- 06 Supporting Information.pdf
- Video 1 Seismic precursor anomaly of HS14 geothermal fluid.MP4
- Video 2 Post-earthquake anomaly of geothermal fluid in HS04.mp4

The copyright of individual parts of the supplement might differ from the article licence.
